# Supplementary material
Source: PubMed Central journal article supplement (PMC4785816)
Supplement: berm028326.ww1_default.pdf [file berm028326.ww1_default.pdf]

**Supplemental Table A. Exclusions (sequential) at baseline.**

|                                    | <b>HPFS</b> | <b>NHS</b>  | <b>NHS II</b> |
|------------------------------------|-------------|-------------|---------------|
| Baseline                           | 1986 - 1990 | 1986 - 1990 | 1991 - 1995   |
| Baseline n                         | 51,529      | 121,701     | 116,686       |
| Duplicate records                  | 0           | 0           | 256           |
| Missing date of birth              | 36          | 0           | 0             |
| Died before baseline               | 64          | 2,668       | 941           |
| 70+ blank responses on FFQ         | 297         | 0           | 21            |
| Implausible reported energy intake | 952         | 7,658       | 17,942        |
| Cancer                             | 3,485       | 10,556      | 2,506         |
| Diabetes                           | 2,193       | 4,509       | 1,701         |
| Ulcerative colitis                 | 610         | 1,181       | 1,454         |
| Pulmonary embolism                 | 278         | 439         | 2,612         |
| Coronary artery bypass graft       | 2,223       | 422         | 22            |
| Myocardial infarction              | 1,321       | 1,951       | 519           |
| Angina                             | 1,106       | 3,621       | 490           |
| Stroke                             | 324         | 511         | 396           |
| Lupus                              | 0           | 405         | 334           |
| Irritable bowel                    | 27          | 100         | 112           |
| BMI $\geq 30$ kg/m <sup>2</sup>    | 2,661       | 6,438       | 9,562         |
| Over age 65 years                  | 5,067       | 4,768       | 0             |
| Pregnant                           | NA          | 0           | 8,980         |
| Missing data                       |             |             |               |
| Hours of sitting/TV                | 7,379       | 0           | 650           |
| Physical activity                  | 178         | 29,674      | 76            |
| Diet                               | 1,936       | 5,722       | 2,080         |
| BMI                                | 740         | 1,044       | 420           |
| Weight change                      | 127         | 611         | 1,474         |
| N for analysis                     | 20,525      | 39,423      | 64,138        |

FFQ = Food Frequency Questionnaire

**Supplemental Table B. Comparison of original vs. analysis cohorts, mean (SD).**

|                                        | HPFS        |             | NHS         |             | NHS II      |             |
|----------------------------------------|-------------|-------------|-------------|-------------|-------------|-------------|
|                                        | Original    | Analysis    | Original    | Analysis    | Original    | Analysis    |
| Age (years)                            | 54.5 (9.9)  | 46.9 (6.0)  | 52.5 (7.3)  | 48.5 (5.8)  | 36.1 (4.7)  | 36.3 (4.5)  |
| BMI (kg/m <sup>2</sup> )               | 25.5 (3.4)  | 24.6 (2.3)  | 25.4 (4.8)  | 23.5 (2.8)  | 24.7 (5.4)  | 22.8 (2.8)  |
| Physical activity (MET-hr/wk)          | 20.8 (29.7) | 23.5 (31.4) | 14.1 (21.0) | 15.0 (20.5) | 21.8 (29.7) | 21.6 (27.5) |
| Alcohol (servings/d)                   | 0.9 (1.2)   | 0.9 (1.1)   | 0.5 (0.9)   | 0.5 (0.8)   | 0.3 (0.5)   | 0.3 (0.5)   |
| Total fruit without juice (servings/d) | 1.6 (1.4)   | 1.5 (1.2)   | 1.6 (1.3)   | 1.5 (1.1)   | 1.2 (1.0)   | 1.2 (0.9)   |
| Total vegetables (servings/d)          | 3.0 (2.0)   | 2.9 (1.7)   | 3.3 (1.9)   | 3.1 (1.7)   | 3.2 (2.2)   | 3.1 (2.0)   |

**Supplemental Table E. Common Sources of Anthocyanins, Polymers, and Flavonols.**

|                               | mg/100g* | serving size | mg/serving |
|-------------------------------|----------|--------------|------------|
| <b>Anthocyanins</b>           |          |              |            |
| Blueberries                   | 163.3    | 1/2 cup      | 120.8      |
| Blackberries                  | 100.6    | 1/2 cup      | 70.4       |
| Black plums                   | 56.0     | 1 medium     | 37.0       |
| Red grapes                    | 48.0     | 1/2 cup      | 36.5       |
| Raspberries                   | 48.6     | 1/2 cup      | 30.2       |
| Red wine                      | 19.3     | 5 oz         | 28.3       |
| Cherries                      | 32.0     | 1/2 cup      | 22.4       |
| Strawberries                  | 27.0     | 1/2 cup      | 20.5       |
| Radishes                      | 63.1     | 2 medium     | 5.7        |
| Pears                         | 2.1      | 1 medium     | 3.7        |
| <b>Flavonols</b>              |          |              |            |
| Onions (cooked)               | 24.7     | 1 medium     | 27.2       |
| Tea (brewed)                  | 4.1      | 8 oz         | 9.6        |
| Black plums                   | 12.5     | 1 medium     | 8.2        |
| Apples                        | 4.2      | 1 medium     | 7.6        |
| Kidney beans (cooked)         | 7.3      | 1/2 cup      | 6.2        |
| Spring onions/Scallions (raw) | 12.0     | 1/2 cup      | 3.6        |
| Raw spinach                   | 10.7     | 1 cup        | 3.2        |
| Beer                          | 0.9      | 12 oz        | 3.0        |
| Red wine                      | 1.6      | 5 oz         | 2.3        |
| Pears                         | 1.1      | 1 medium     | 2.0        |
| <b>Polymers</b>               |          |              |            |
| Tea (brewed)                  | 91.5     | 8 fluid oz   | 216.9      |
| Pecans                        | 476.8    | 1.5 oz       | 202.7      |
| Plums                         | 209.9    | 1/2 cup      | 167.9      |
| Blueberries                   | 173.0    | 1/2 cup      | 138.4      |
| Strawberries                  | 138.0    | 1/2 cup      | 110.4      |
| Pistachio nuts                | 226.4    | 1.5 oz       | 96.2       |
| Apples                        | 98.5     | 1/2 cup      | 78.8       |
| Almonds                       | 176.3    | 1.5 oz       | 74.9       |
| Grapes                        | 70.4     | 1/2 cup      | 56.3       |
| Peaches                       | 67.5     | 1/2 cup      | 54.0       |

\*mg/100g based on USDA Database for the Flavonoid Content of Selected Foods, Release 3.1 (2014)

**Supplemental Table C. 4-year Weight change (lbs, 95% CI) associated with increased daily flavonoid intake (1 SD per day), including individuals who were obese ( $\geq 30$  kg/m<sup>2</sup>) at baseline.**

|                                   | <b>HPFS</b><br><b>n = 21,979</b><br><b>Model 2</b> | <b>NHS</b><br><b>n = 45,162</b><br><b>Model 2</b> | <b>NHS II</b><br><b>n = 73,478</b><br><b>Model 2</b> | <b>Pooled**</b><br><b>n = 140,619</b><br><b>Model 2</b> |
|-----------------------------------|----------------------------------------------------|---------------------------------------------------|------------------------------------------------------|---------------------------------------------------------|
| Flavonols<br>(SD = 7 mg)          | -0.16<br>(-0.21, -0.11)*                           | -0.11<br>(-0.14, -0.07)*                          | -0.27<br>(-0.30, -0.24)*                             | -0.18<br>(-0.28, -0.07)*                                |
| Flavones<br>(SD = 0.9 mg)         | 0.02<br>(-0.02, 0.05)                              | -0.01<br>(-0.04, 0.03)                            | -0.03<br>(-0.06, 0.00)                               | -0.01<br>(-0.03, 0.02)                                  |
| Flavanones<br>(SD = 25 mg)        | 0.05<br>(0.00, 0.10)*                              | 0.15<br>(0.11, 0.19)*                             | 0.19<br>(0.14, 0.23)*                                | 0.13<br>(0.05, 0.21)*                                   |
| Flavan-3-ols<br>(SD = 45 mg)      | -0.09<br>(-0.16, -0.02)*                           | -0.03<br>(-0.07, 0.02)                            | -0.13<br>(-0.18, -0.09)*                             | -0.09<br>(-0.15, -0.02)*                                |
| Anthocyanins<br>(SD = 10 mg)      | -0.20<br>(-0.24, -0.16)*                           | -0.19<br>(-0.22, -0.16)*                          | -0.33<br>(-0.35, -0.30)*                             | -0.24<br>(-0.34, -0.14)*                                |
| Polymers<br>(SD = 138 mg)         | -0.17<br>(-0.24, -0.10)*                           | -0.12<br>(-0.17, -0.07)*                          | -0.27<br>(-0.31, -0.23)*                             | -0.19<br>(-0.29, -0.09)*                                |
| Proanthocyanidins<br>(SD = 72 mg) | -0.45<br>(-0.52, -0.37)*                           | -0.64<br>(-0.70, -0.57)*                          | -0.92<br>(-0.97, -0.86)*                             | -0.67<br>(-0.94, -0.39)                                 |
| Total flavonoids<br>(SD = 194 mg) | -0.19<br>(-0.26, -0.12)*                           | -0.13<br>(-0.18, -0.09)*                          | -0.30<br>(-0.35, -0.26)*                             | -0.21<br>(-0.32, -0.10)*                                |

**Model 1:** adjusted for age.

**Model 2:** adjusted for age and BMI at baseline, change in: smoking status, physical activity, hours of sitting or watching TV, hours of sleep, fried potatoes, juice (non-citrus for flavones and flavanones), whole grains, refined grains, fried foods, nuts, whole-fat dairy, low-fat dairy, sugar sweetened beverages, diet beverages, sweets, processed meats, non-processed meats, trans fat, alcohol, seafood, and caffeine.

\* 95% CI excludes zero (null).

\*\* Meta-analysis with random effects.

**Supplemental Table D. 4-year Weight change (lbs, 95% CI) associated with increased daily flavonoid intake (1 SD per day), complete case analysis (last observation is not carried forward).**

|                                   | <b>HPFS</b><br><b>n = 15,136</b><br><b>Model 2</b> | <b>NHS</b><br><b>n = 21,909</b><br><b>Model 2</b> | <b>NHS II</b><br><b>n = 50,745</b><br><b>Model 2</b> | <b>Pooled**</b><br><b>n = 87,790</b><br><b>Model 2</b> |
|-----------------------------------|----------------------------------------------------|---------------------------------------------------|------------------------------------------------------|--------------------------------------------------------|
| Flavonols<br>(SD = 7 mg)          | -0.17<br>(-0.23, -0.11)*                           | -0.04<br>(-0.10, 0.03)                            | -0.21<br>(-0.25, -0.17)*                             | -0.14<br>(-0.23, -0.05)*                               |
| Flavones<br>(SD = 0.9 mg)         | -0.02<br>(-0.06, 0.03)                             | -0.05<br>(-0.11, 0.01)                            | -0.10<br>(-0.15, -0.06)*                             | -0.06<br>(-0.11, 0.00)                                 |
| Flavanones<br>(SD = 25 mg)        | 0.05<br>(-0.01, 0.10)                              | 0.07<br>(0.00, 0.14)*                             | 0.18<br>(0.12, 0.22)*                                | 0.10<br>(0.02, 0.18)*                                  |
| Flavan-3-ols<br>(SD = 45 mg)      | -0.13<br>(-0.21, -0.05)*                           | -0.02<br>(-0.11, 0.07)                            | -0.08<br>(-0.14, -0.03)*                             | -0.08<br>(-0.13, -0.03)*                               |
| Anthocyanins<br>(SD = 10 mg)      | -0.20<br>(-0.25, -0.15)*                           | -0.15<br>(-0.21, -0.10)*                          | -0.32<br>(-0.35, -0.29)*                             | -0.23<br>(-0.33, -0.12)*                               |
| Polymers<br>(SD = 138 mg)         | -0.19<br>(-0.27, -0.11)*                           | -0.09<br>(-0.18, -0.01)*                          | -0.21<br>(-0.26, -0.16)*                             | -0.17<br>(-0.24, -0.10)*                               |
| Proanthocyanidins<br>(SD = 72)    | -0.46<br>(-0.56, -0.37)*                           | -0.47<br>(-0.58, -0.35)*                          | -0.87<br>(-0.94, -0.80)*                             | -0.60<br>(-0.89, -0.31)                                |
| Total flavonoids<br>(SD = 194 mg) | -0.22<br>(-0.30, -0.14)*                           | -0.11<br>(-0.19, -0.02)*                          | -0.23<br>(-0.29, -0.18)*                             | -0.19<br>(-0.26, -0.12)*                               |

**Model 1:** adjusted for age.

**Model 2:** adjusted for age and BMI at baseline, change in: smoking status, physical activity, hours of sitting or watching TV, hours of sleep, fried potatoes, juice (non-citrus for flavones and flavanones), whole grains, refined grains, fried foods, nuts, whole-fat dairy, low-fat dairy, sugar sweetened beverages, diet beverages, sweets, processed meats, non-processed meats, trans fat, alcohol, seafood, and caffeine.

\* 95% CI excludes zero (null).

\*\* Meta-analysis with random effects.
